# Supplementary material for: Differential Expression of BARD1 Isoforms in Melanoma
Source: MDPI journal article supplement (doi:10.3390/genes12020320), 2021-02-23
Supplement: s1 [file s1]

**Table S1. An evaluation of samples included in each technique**

| Sample              | Nanopore | Sanger Sequencing | RNAseq | RT-qPCR |
|---------------------|----------|-------------------|--------|---------|
| FFPE patient tissue | X        | X                 | X      | ✓       |
| NZM3                | ✓        | ✓                 | ✓      | ✓       |
| NZM6                | ✓        | ✓                 | ✓      | ✓       |
| NZM11               | X        | X                 | ✓      | ✓       |
| NZM12               | X        | X                 | ✓      | ✓       |
| NZM15               | ✓        | ✓                 | ✓      | ✓       |
| NZM18               | X        | X                 | X      | ✓       |
| NZM20               | X        | X                 | ✓      | ✓       |
| NZM22               | X        | X                 | ✓      | ✓       |
| NZM25               | X        | X                 | X      | ✓       |
| NZM40               | X        | X                 | ✓      | ✓       |
| NZM45               | X        | X                 | ✓      | ✓       |
| NZM53               | X        | X                 | ✓      | ✓       |
| Melanocyte          | ✓        | ✓                 | ✓      | ✓       |

**Table S2. Primer sequences used in the study**

| RT-qPCR            |                             |                         |
|--------------------|-----------------------------|-------------------------|
| Primer name        | Forward primer sequence     | Reverse Primer sequence |
| BARD1-β            | CTGCTCGCGTTGATTTGAAAG       | ACTTCGAGGGCTAAACCACA    |
| BARD1-δ            | TGCTCGCGTTGTAATATATTTG      | GCTGCCCAGTGTTTACTACTG*  |
| BARD1-γ            | CAATGAGCTGTCAGGGCGAC        | GCAAGCTTCATGCAATGGTG    |
| BARD1-ε            | TGAGCTGTCAGGGGTAAAAG        | CAAACAGCTTTGGCAACAGCTG# |
| BARD1-η            | TGCTCGCGTTGGGGTAAAAG        | CAAACAGCTTTGGCAACAGCTG# |
| BARD1-φ            | CTGTAGTAATATATTTGGTCTGC     | GCTGCCCAGTGTTTACTACTG*  |
| BARD1-Δ(E3_E9)     | CATCTTCTGTAGGGGTAAAAG       | CTCTGTTGAGCCTGCTTCTG    |
| BARD1-▼(i8)        | GAGTTTGACAGTACAGGTGAG       | GGTAGTTCTCCAAAAGGATCA   |
| BARD1-IVS10▼176    | GGTAAAAGCATGTCTACGAA        | CAAACAGCTTTGGCAACTTCTG  |
| BARD1-IVS10+131▼46 | AACAGAGAACAGCTGCACTTG       | CTGGCTTGGGCTTTCTACTG    |
| TBP                | GAACATCATGGATCAGAACAACA     | ATAGGGATTCCGGGAGTCAT    |
| UCB                | GCAAAGATCCAAGATAAGGAA       | GGACCAAGTGCAGAGTGGAC    |
| PGK1               | TGCAAAGGCCTTGGAGAG          | TGGATCTTGTCTGCAACTTTAGC |
| Sanger Sequencing  |                             |                         |
| BARD1-Δ(E3_E9)     | GCACATCTTCTGTAGGGGTA        | CTCTGTTGAGCCTGCTTCTG    |
| BARD1-▼(i8)        | GAGTTTGACAGTACAGGTGAG       | TTGAACTGCATCACCAGGAA    |
| BARD1-IVS10▼176    | ATGCTTGGGATTCTCAATGG        | CAAACAGCTTTGGCAACTTCTG  |
| BARD1-IVS10+131▼46 | AAC AGA GAA CAG CTG CAC TTG | CTGGCTTGGGCTTTCTACTG    |

**Table S3. BARD1 transcript variants identified using long-range Nanopore sequencing**

| No. | Splicing event description | RNA change | Number of reads in Nanopore |       |        |       |
|-----|----------------------------|------------|-----------------------------|-------|--------|-------|
|     |                            |            | NZM 3                       | NZM 6 | NZM 15 | MelSt |

|                 |                         |                                             |       |       |      |       |
|-----------------|-------------------------|---------------------------------------------|-------|-------|------|-------|
| 1               | Full length             | none                                        | 5193  | 2982  | 667  | 3309  |
| 2               | BARD1-β; Δ(E2_E3)       | r.159_364del                                | 619   | 72    | 102  | 144   |
| 3               | BARD1-δ; Δ(E2_E6)       | r.159_1568del                               | 9537  | 10288 | 5495 | 10087 |
| 4               | BARD1-η; Δ(E2_E9)       | r.159_1903del                               | 14671 | 10522 | 7387 | 14052 |
| 5               | BARD1-κ; Δ(E3)          | r.216_364del                                | 950   | 349   | 288  | 337   |
| 6               | BARD1-γ; Δ(E4)          | r.365_1314del                               | 797   | 917.0 | 1126 | 2160  |
| 7               | BARD1-π; Δ(E4q)         | r.907_1314del                               | 187   | 161   | 6    | 11    |
| 8               | BARD1-ε; Δ(E4_E9)       | r.365_1903del                               | 13794 | 10588 | 8425 | 8206  |
| 9               | BARD1-φ; Δ(E3_E6)       | r.216_1568del                               | 8543  | 10924 | 7488 | 4372  |
| 10              | Δ(E2_E3,E4q)*           | r.159_364del+907_1314del                    | 50    | 1     | 3    | 25    |
| 11              | Δ(E2_E3,E5_E9)*         | r.159_364del+1315_1903del                   | 86    | 51    | 42   | 64    |
| 12              | Δ(E2,E4)                | r.159_1314del                               | 12    | 1     | 8    | 50    |
| 13              | Δ(E2,E4_E9)             | r.159_215+365_1903del                       | 129   | 117   | 45   | 87    |
| 14              | Δ(E2_E4)                | r.159_1314del                               | 99    | 170   | 386  | 221   |
| 15              | Δ(E2_E4,E7_E9)*         | r.159_1314del+1569_1903del                  | 27    | 21    | 14   | 134   |
| 16              | Δ(E2_E4,E8)             | r.159_1314del+1678_1810del                  | 7     | 1     | 0    | 2     |
| 17              | Δ(E2_E6)                | r.159_1568del                               | 6     | 3     | 6    | 7     |
| 18              | Δ(E2_E6,E8)             | r.159_1568+1678_1810del                     | 95    | 1     | 3    | 2     |
| 19              | Δ(E2_E6,E8_E9)          | r.159_1568+1678_1903del                     | 28    | 21    | 16   | 19    |
| 20              | Δ(E2_E6,E9_E10)*        | r.159_1568+1811_2001del                     | 2     | 2     | 2    | 2     |
| 21              | Δ(E2_E6,E10)*           | r.159_1568+1904_2001del                     | 4     | 0     | 0    | 0     |
| 22 <sup>⊠</sup> | Δ(E2_E6),IVS10▼176*     | r.159_1568+2001_2002ins2001+1_2001_176      | 26    | 13    | 4    | 19    |
| 23 <sup>□</sup> | Δ(E2_E6),IVS10+131▼46*  | r.159_1568+2001_2002ins2001+131_2001+176    | 78    | 106   | 45   | 79    |
| 24              | Δ(E2_E7)                | r.159_1677del                               | 215   | 52    | 179  | 168   |
| 25              | Δ(E2_E7,E9)             | r.159_1677del+ 1811_1903del                 | 81    | 57    | 28   | 66    |
| 26 <sup>⊠</sup> | Δ(E2_E7),IVS10▼176*     | r.159_1677del+2001_2002ins2001+1_2001_176   | 5     | 0     | 1    | 3     |
| 27 <sup>□</sup> | Δ(E2_E7),IVS10+131▼46*  | r.159_1677del+2001_2002ins2001+131_2001+176 | 5     | 1     | 3    | 4     |
| 28              | Δ(E2_E8)*               | r.159_1810del                               | 9     | 1     | 4    | 1     |
| 29 <sup>⊠</sup> | Δ(E2_E9),IVS10▼176*     | r.159_1903del+2001_2002ins2001+1_2001_176   | 302   | 3     | 2    | 238   |
| 30 <sup>□</sup> | Δ(E2_E10),IVS10+131▼46* | r.159_2001del+2001_2002ins2001+131_2001+176 | 233   | 79    | 47   | 112   |
| 31              | Δ(E3,E5)*               | r.216_1395del+1315_1395del                  | 5     | 3     | 7    | 12    |
| 32              | Δ(E3,E5_E6)*            | r.216_364del+1315_1568del                   | 113   | 115   | 56   | 76    |
| 33              | Δ(E3,E5_E9)             | r.216_364del+1315_1903del                   | 89    | 74    | 43   | 59    |
| 34 <sup>⊠</sup> | Δ(E3),IVS10▼176*        | r.216_364del+2001_2002ins2001+1_2001_176    | 42    | 2     | 1    | 20    |
| 35              | Δ(E3),IVS10+131▼46*     | r.216_364del+2001_2002ins2001+131_2001+176  | 20    | 2     | 0    | 5     |
| 36              | Δ(E3_E4)                | r.216_1314del                               | 380   | 171   | 714  | 293   |
| 37              | Δ(E3,E4q)               | r.216_364del+907_1314del                    | 66    | 4     | 2    | 4     |
| 38              | Δ(E3_E4,E6)*            | r.216_1314del+1396_1568del                  | 180   | 197   | 330  | 197   |
| 39              | Δ(E3_E4,E8)             | r.216_1568+1678_1810del                     | 49    | 0     | 0    | 4     |
| 40 <sup>⊙</sup> | Δ(E3_E4),▼(i8)*         | r.216_1314del+1810_1811ins562               | 14    | 46    | 9    | 4     |
| 41 <sup>⊠</sup> | Δ(E3_E4),IVS10▼176*     | r.216_1314del+2001_2002ins2001+1_2001_176   | 41    | 0     | 87   | 5     |

|                  |                         |                                                           |      |      |      |      |
|------------------|-------------------------|-----------------------------------------------------------|------|------|------|------|
| 42               | Δ(E3_E5)                | r.216_1395del                                             | 21   | 2    | 2    | 7    |
| 43               | Δ(E3_E6,E8)             | r.216_1568+1678_1810del                                   | 92   | 3    | 6    | 4    |
| 44 <sup>⊗</sup>  | Δ(E3_E6),▼(i8)*         | r.216_1568+1810_1811ins562                                | 20   | 15   | 4    | 22   |
| 45               | Δ(E3_E6,E8_E10)*        | r.216_1568+1678_2001del                                   | 1    | 1    | 3    | 2    |
| 46               | Δ(E3_E6,E9)*            | r.216_1568+1811_1903del                                   | 90   | 59   | 36   | 65   |
| 47 <sup>⊗</sup>  | Δ(E3_E6),IVS10▼176*     | r.216_1568+2001_2002ins2001+1_2001_176                    | 20   | 6    | 6    | 7    |
| 48 <sup>□</sup>  | Δ(E3_E6),IVS10+131▼46*  | r.216_1568+2001_2002ins2001+131_2001+176                  | 118  | 87   | 14   | 14   |
| 49               | Δ(E3,E7)                | r.216_364del+1569_1677del                                 | 6    | 0    | 2    | 4    |
| 50               | Δ(E3_E7)                | r.216_1677del                                             | 683  | 768  | 130  | 647  |
| 51               | Δ(E3,E7_E9)             | r.216_364del+1569_1903del                                 | 42   | 16   | 15   | 28   |
| 52 <sup>⊗</sup>  | Δ(E3_E7),IVS10▼176*     | r.216_1677del+2001_2002ins2001+1_2001_176                 | 68   | 0    | 0    | 3    |
| 53               | Δ(E3,E8)                | r.216_364del+1678_1810del                                 | 11   | 0    | 4    | 2    |
| 54               | Δ(E3_E8)                | r.216_1810del                                             | 95   | 185  | 3    | 8    |
| 55 <sup>⊗</sup>  | Δ(E3_E9)                | r.216_1903del                                             | 2759 | 1335 | 2779 | 2312 |
| 56               | Δ(E4,E7)                | r.365_1314del+1569_1677del                                | 19   | 102  | 7    | 8    |
| 57               | Δ(E4,E8_E9)             | r.365_1314del+1678_1903del                                | 25   | 23   | 54   | 28   |
| 58 <sup>⊗</sup>  | Δ(E4),▼(i8)*            | r.365_1314del+1810_1811ins562                             | 20   | 15   | 4    | 22   |
| 59 <sup>⊗⊗</sup> | Δ(E4),▼(i8), IVS10▼176* | r.365_1314del+1810_1811ins562+2001_2002ins2001+1_2001_176 | 9    | 1    | 0    | 2    |
| 60 <sup>⊗</sup>  | Δ(E4),IVS10▼176*        | r.365_1314del+2001_2002ins2001+1_2001_176                 | 72   | 3    | 7    | 71   |
| 61 <sup>⊗</sup>  | Δ(E4q),IVS10▼176*       | r.907_1314del+2001_2002ins2001+1_2001_176                 | 9    | 0    | 2    | 4    |
| 62               | Δ(E4_E6)                | r.365_1568del                                             | 597  | 343  | 832  | 81   |
| 63               | Δ(E4_E6,E8)             | r.365_1568del+1678_1810del                                | 10   | 3    | 3    | 42   |
| 64 <sup>⊗</sup>  | Δ(E4_E6),IVS10▼176*     | r.365_1568del+1810_1811ins562+2001_2002ins2001+1_2001_176 | 11   | 1    | 1    | 2    |
| 65               | Δ(E4_E7)                | r.365_1677del                                             | 187  | 6    | 13   | 69   |
| 66               | Δ(E4_E8)                | r.365_1810del                                             | 112  | 3    | 1    | 8    |
| 67 <sup>⊗</sup>  | Δ(E4_E9),IVS10▼176*     | r.365_1903del+2001_2002ins2001+1_2001_176                 | 32   | 13   | 8    | 15   |
| 68 <sup>□</sup>  | Δ(E4_E9),IVS10+131▼46*  | r.365_1903del+2001_2002ins2001+131_2001+176               | 36   | 18   | 17   | 27   |
| 69               | Δ(E5)                   | r.1315_1395del                                            | 19   | 3    | 3    | 11   |
| 70               | Δ(E5_E9)                | r.1315_1903del                                            | 93   | 72   | 58   | 63   |
| 71               | Δ(E6)                   | r.1396_1568del                                            | 210  | 193  | 94   | 173  |
| 72               | Δ(E7)                   | r.1569_1677del                                            | 27   | 14   | 16   | 16   |
| 73               | Δ(E8_E9)                | r.1678_1903del                                            | 33   | 32   | 12   | 35   |
| 74               | Δ(E9_E10)               | r.1811_2001del                                            | 6    | 3    | 1    | 5    |
| 75 <sup>⊗</sup>  | IVS10▼176*              | r.2001_2002ins2001+1_2001_176                             | 70   | 2    | 10   | 13   |
| 76 <sup>□</sup>  | IVS10+131▼46            | r.2001_2002ins2001+131_2001+176                           | 22   | 3    | 2    | 25   |

\* indicates novel isoforms identified in this study (not reported by Walker et al., 2019).

⊗ indicates all transcripts with retention of 176 bp in intron 10 (IVS10▼176).

□ indicates all transcripts with activation of 46 bp intronic-exon (IVS10+131▼46)

⊗ indicates all transcripts with retention of intron 8 (▼(i8)).

⊗ indicates transcripts with exon 3 to 9 deletion (Δ(E3\_E9)).

Table S4. Expression of annotated BARD1 transcripts from RNA-seq data.

| Transcript name                      | Ensembl ID          | Transcripts per million kilobases (TPM) |      |       |       |       |       |       |       |                       |       |      |      |      |
|--------------------------------------|---------------------|-----------------------------------------|------|-------|-------|-------|-------|-------|-------|-----------------------|-------|------|------|------|
|                                      |                     | Melanoma cell lines                     |      |       |       |       |       |       |       | Melanocyte cell lines |       |      |      |      |
|                                      |                     | NZM3                                    | NZM6 | NZM11 | NZM12 | NZM15 | NZM20 | NZM22 | NZM40 | NZM45                 | NZM50 | M1   | M2   | M3   |
| FL-BARD1                             | ENST00000260947.9_2 | 4.31                                    | 3.43 | 6.851 | 8.085 | 8.35  | 2.64  | 9.22  | 5.95  | 11.614                | 3.174 | 4.94 | 4.30 | 3.94 |
| BARD1-204 (NMD)                      | ENST00000455743.5_1 | 1.91                                    | 1.03 | 3.714 | 0.416 | 3.50  | 0.00  | 0.00  | 0.659 | 0.634                 | 1.931 | 2.32 | 1.22 | 0.56 |
| BARD1- $\gamma$ ; $\Delta$ (E4)      | ENST00000620057.4_1 | 0.25                                    | 1.03 | 1.526 | 0.538 | 0.63  | 0.348 | 1.14  | 0.503 | 2.992                 | 0.670 | 0.00 | 0.00 | 0.00 |
| BARD1-208 (NC, retained intron)      | ENST00000479904.1_1 | 0.22                                    | 0.29 | 0.240 | 0.139 | 0.33  | 0.057 | 0.09  | 0.175 | 0.306                 | 0.173 | 0.05 | 0.00 | 0.00 |
| BARD1-215 (NMD; starts in ex 2)      | ENST00000650978.1_1 | 0.11                                    | 0.07 | 1.168 | 0.780 | 0.94  | 0.020 | 0.283 | 0.075 | 0.846                 | 0.272 | 0.28 | 0.02 | 0.07 |
| BARD1-206 (NC)                       | ENST00000471590.5_1 | 0.05                                    | 0.00 | 0.051 | 0.156 | 0.07  | 0.01  | 0.06  | 0.125 | 0.029                 | 0.023 | 0.01 | 0.00 | 0.04 |
| BARD1-203 (ex10/11 only)             | ENST00000432456.5_2 | 0.03                                    | 0.00 | 0.033 | 0.024 | 0.00  | 0.00  | 0.022 | 0.032 | 0.00                  | 0.019 | 0.04 | 0.11 | 0.01 |
| BARD1-205 (NC, retained intron)      | ENST00000465841.1_1 | 0.00                                    | 0.00 | 0.016 | 0.022 | 0.02  | 0.013 | 0.00  | 0.00  | 0.021                 | 0.018 | 0.01 | 0.01 | 0.02 |
| BARD1- $\epsilon$ ; $\Delta$ (E4_E9) | ENST00000619009.5_2 | 0.00                                    | 0.00 | 0.00  | 0.00  | 0.00  | 0.00  | 0.00  | 0.00  | 0.186                 | 0.00  | 0.00 | 0.00 | 0.00 |
| BARD1- $\alpha$ ; $\Delta$ (E2)      | ENST00000617164.5_2 | 0.00                                    | 0.00 | 0.00  | 0.00  | 0.00  | 0.00  | 0.00  | 0.00  | 0.517                 | 0.00  | 0.00 | 0.00 | 0.00 |
| BARD1- $\delta$ ; $\Delta$ (E2_E6)   | ENST00000613374.5_2 | 0.00                                    | 0.00 | 0.00  | 0.00  | 0.00  | 0.00  | 0.00  | 0.00  | 0.00                  | 0.112 | 0.00 | 0.00 | 0.00 |
| BARD1- $\varphi$ ; $\Delta$ (E3_E6)  | ENST00000421162.2_3 | 0.00                                    | 0.00 | 0.00  | 0.00  | 0.00  | 0.00  | 0.00  | 0.00  | 0.00                  | 0.00  | 0.00 | 0.00 | 0.00 |
| BARD1- $\pi$ ; $\Delta$ (E4q)        | ENST00000613706.5_2 | 0.00                                    | 0.11 | 0.00  | 0.00  | 0.00  | 0.00  | 0.00  | 0.00  | 0.00                  | 0.278 | 0.00 | 0.00 | 0.00 |
| BARD1-209 (NMD)                      | ENST00000613192.2_2 | 0.00                                    | 0.00 | 0.00  | 0.00  | 0.00  | 0.00  | 0.00  | 0.00  | 0.00                  | 0.00  | 0.00 | 0.00 | 0.00 |
| BARD1-207 (NC)                       | ENST00000471787.1_1 | 0.00                                    | 0.07 | 0.00  | 0.00  | 0.00  | 0.00  | 0.00  | 0.00  | 0.00                  | 0.00  | 0.09 | 0.00 | 0.00 |

NMD – Designates transcripts which undergo nonsense-mediated mRNA decay.

NC – Designates transcripts which do not encode a functional polypeptide.

Numerical symbols (E.g. BARD1-204) correspond to Ensembl transcript.

5  
6  
7  
8  
910  
11

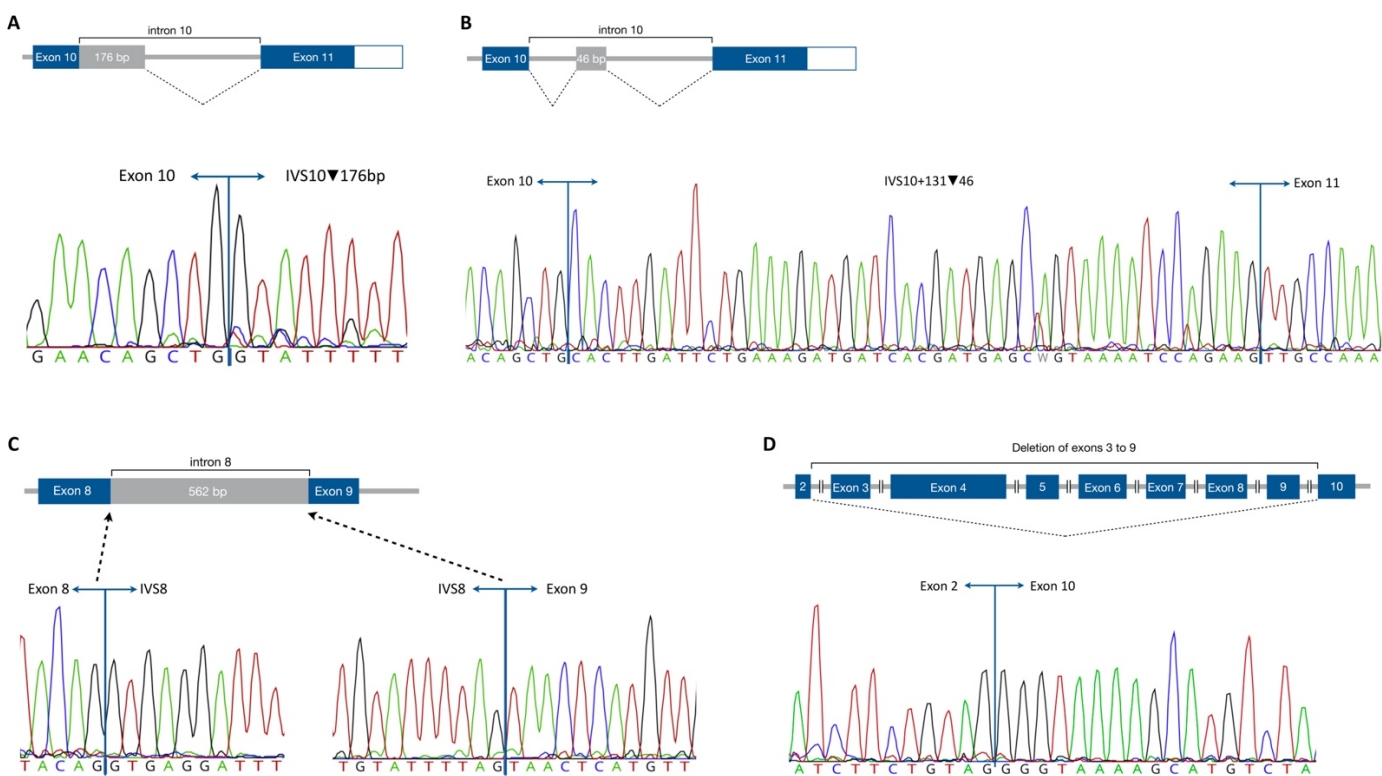

**Figure S1.** Validation of Nanopore results by Sanger sequencing. Top panels entail schematics corresponding to electropherogram for regions of interest below. A) Retention of 176 bp in intron 10. B) Activation of intronic exon within intron 10. C) Retention of intron 8 (left panel demonstrates exon 8-intron 8 junction, right panel demonstrates intron 8-exon 9 junction). D) Skipping of exons 3 to 9.

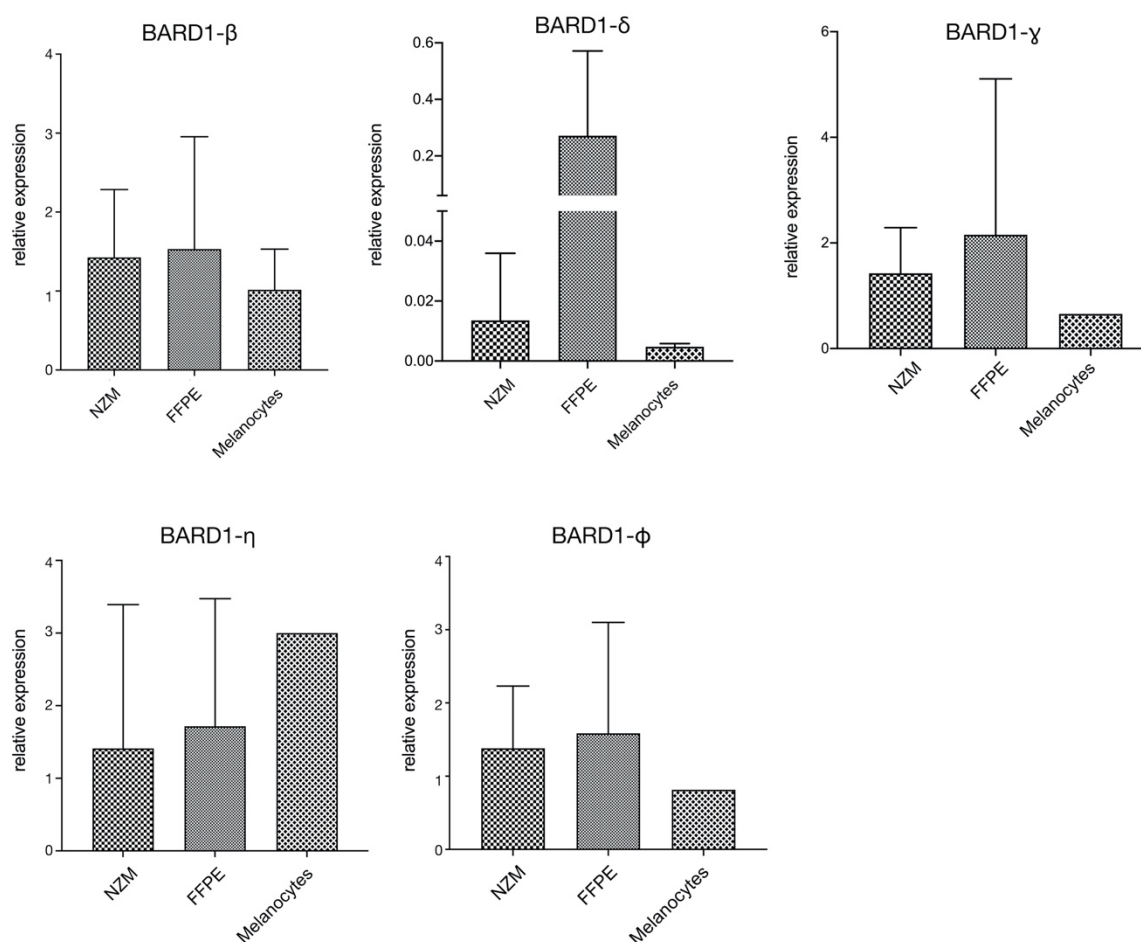

**Figure S2.** Relative expression of predominant BARD1 isoforms in melanoma tissues, melanoma cell lines and melanocytes. This was analysed in FFPE patient melanoma samples and melanoma cell lines (NKM3, NKM6, NKM15, NKM11, NKM12, NKM18, NKM20, NKM22, NKM25, NKM40, NKM45, NKM53) and melanocytes using RT-qPCR. Expression was normalised to reference genes TBP, UBC and PGK1. Amplification of BARD1-ε in FFPE was unsuccessful, therefore results are not presented.

19

20

21

22

23

24

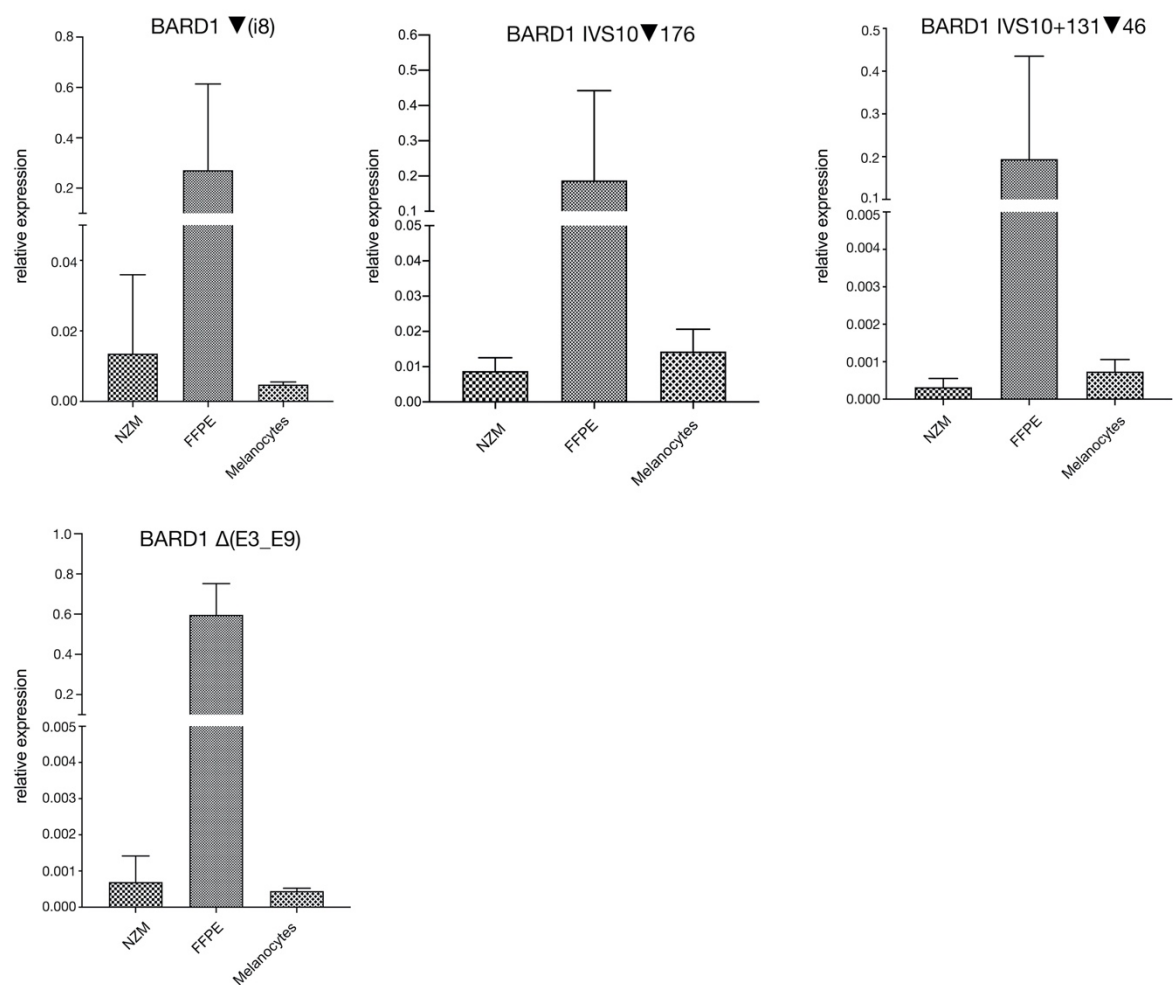

**Figure S3.** Relative expression of novel BARD1 splice events in melanoma tissues, melanoma cell lines and melanocytes. This was analysed in FFPE patient melanoma samples and melanoma cell lines (NZM3, NZM6, NZM15, NZM11, NZM12, NZM18, NZM20, NZM22, NZM25, NZM40, NZM45, NZM53) and melanocytes using RT-qPCR. Expression was normalised to reference genes TBP, UBC and PGK1.
